# Supplementary material
Source: HighWire-hosted journal article supplement (https://rc.rcjournal.com/highwire/filestream/11946/field_highwire_adjunct_files/0/RC-02616.R2_KACMAREK_Suppl.pdf)

# Supplemental Material

## A comparison of leak compensation during pediatric non-invasive positive pressure ventilation; a lung model study

Jun Oto, M.D., PhD, Christopher T. Chenelle, B.A., Andrew D. Marchese, B.S., Robert M Kacmarek PhD, RRT.

### Additional results

Suppl. Table 1 Triggering delay time and delivered tidal volume in each patient' size

| Ventilator  | model | T delay, ms |      |      |      | Vt, ml |      |     |     |
|-------------|-------|-------------|------|------|------|--------|------|-----|-----|
|             |       | B           | L1   | L2   | L3   | B      | L1   | L2  | L3  |
| Servo i     | 10kg  | 107*        | 112* | 106* | 99*  | 73*    | 70*  | 65* | 58* |
|             | 20kg  | 111         | 123  | 136  | 148  | 157    | 147  | 134 | 116 |
|             | 30kg  | 103         | 106  | 113  | 130  | 195    | 191  | 177 | 153 |
| PB840       | 10kg  | 87          | 90   | 92   | 112  | 74     | 72   | 71  | 60  |
|             | 20kg  | 84          | 78   | 80   | 89   | 134    | 132  | 129 | 111 |
|             | 30kg  | 98          | 92   | 91   | 92   | 197    | 189  | 184 | 159 |
| C3          | 10kg  | 77          | 82   | 97   | 103  | 71     | 70   | 66  | 60  |
|             | 20kg  | 71          | 72   | 82   | 97   | 115    | 111  | 107 | 103 |
|             | 30kg  | 77          | 78   | 85   | 92   | 145    | 143  | 143 | 144 |
| G5          | 10kg  | 89          | 83   | 84   | 114  | 75     | 74   | 69  | 56  |
|             | 20kg  | 90          | 80   | 75   | 85   | 132    | 131  | 117 | 101 |
|             | 30kg  | 92          | 87   | 85   | 81   | 195    | 193  | 181 | 163 |
| Carestation | 10kg  | 64          | NS   | NS   | NS   | 77     | NS   | NS  | NS  |
|             | 20kg  | 69          | 57*  | NS   | NS   | 125    | 158* | NS  | NS  |
|             | 30kg  | 83          | 71   | 115  | NS   | 219    | 203  | 181 | NS  |
| V500        | 10kg  | 75          | NS   | NS   | NS   | 73     | NS   | NS  | NS  |
|             | 20kg  | 66          | NS   | NS   | NS   | 138    | NS   | NS  | NS  |
|             | 30kg  | 104         | 103  | 99   | NS   | 202    | 187  | 171 | NS  |
| Avea        | 10kg  | 58          | NS   | NS   | NS   | 77     | NS   | NS  | NS  |
|             | 20kg  | 63          | NS   | NS   | NS   | 137    | NS   | NS  | NS  |
|             | 30kg  | 72          | NS   | NS   | NS   | 204    | NS   | NS  | NS  |
| Carina      | 10kg  | 79          | 92   | 92   | 115* | 73     | 71   | 71  | 62* |
|             | 20kg  | 79          | 85   | 86   | 112  | 124    | 120  | 117 | 103 |
|             | 30kg  | 87          | 98   | 104  | 116  | 187    | 183  | 187 | 164 |
| V60         | 10kg  | 75          | 76   | 86   | 102  | 76     | 75   | 72  | 63  |
|             | 20kg  | 63          | 67   | 66   | 98   | 146    | 144  | 138 | 117 |
|             | 30kg  | 70          | 72   | 80   | 90   | 219    | 216  | 206 | 189 |
| Vision      | 10kg  | 107         | 112  | 119  | 114* | 73     | 71   | 70  | 64* |
|             | 20kg  | 96          | 94   | 100  | 109  | 153    | 150  | 143 | 127 |

|  | 30kg | 97 | 106 | 106 | 118 | 214 | 209 | 189 | 173 |
|--|------|----|-----|-----|-----|-----|-----|-----|-----|
|--|------|----|-----|-----|-----|-----|-----|-----|-----|

Data are presented as mean

Data from the normal, obstructive and restrictive models for each weight are combined. NS, no synchronization; T delay, time from the beginning of the inspiratory effort of the lung simulator to the maximum negative airway pressure deflection needed to trigger the ventilator; V<sub>t</sub>, delivered tidal volume.

\*Servo *i*, data includes only normal and restrictive models, did not synchronize in the obstructive model.

\*Carestation, data includes only normal and obstructive models, did not synchronize in the restrictive model.

\*Carina, data includes only normal and restrictive models, did not synchronize in the obstructive model.

\*Vision, data includes only normal and restrictive models, did not synchronize in the obstructive model.

## Figure legends

### Suppl. Figure 1

Synchronization, auto-triggering, and miss-triggering under increasing and decreasing leaks.

Top left) Synchronization rates under increasing and decreasing leak.

This figure shows the percentage of synchronization of each ventilator under increasing and decreasing leaks. The rate of synchronization was lower for increasing than for decreasing leaks.

Bottom left) Auto-triggering under increasing and decreasing leak.

This figure shows the percentage of auto-triggering of each ventilator under increasing and decreasing leaks. The rate of auto-triggering was higher for increasing than for decreasing leaks.

Bottom right) Miss-triggering under increasing and decreasing leak.

This figure shows the percentage of miss-triggering of each ventilator under increasing and decreasing leaks. No significant difference was observed in the rate of miss-triggering between increasing and decreasing leaks.

The histogram bars show mean values.

#### Suppl. Figure 2A

Representative wave forms of the G5 in the 10 kg obstructive and restrictive lung models with expiratory trigger sensitivities at 25 % and 50 % of peak inspiratory flow

Left) 10 kg obstructive lung model:

As leak level increased from B to L3, inspiratory time was longer at the 25 % of peak inspiratory flow setting but not at the 50% setting.

Right) 10 kg restrictive lung model:

As leak level increased from B to L3, inspiratory time was longer at the 25 % of peak inspiratory flow setting. On the other hand, these changes were not seen at the 50% setting.

B, baseline leak, L1, 2, 3, leak level 1, 2, 3; AP, airway pressure; EP, esophageal pressure.

#### Suppl. Figure 2B

Representative wave forms of the PB840 in the 10 kg obstructive and restrictive lung models with expiratory trigger sensitivities at 25 % and 50 % of peak inspiratory flow

Left) 10 kg obstructive lung model:

As leak level increased from B to L3, inspiratory time was not changed at either the 25% or 50% of peak inspiratory flow setting.

Right) 10 kg restrictive lung model:

At the 25 % of peak inspiratory flow setting, inspiratory time was approximately half of the lung simulator's inspiratory time. On the other hand, inspiratory time was longer at

the 50% of peak inspiratory flow setting than at the 25% setting.

B, baseline leak; L1, 2, 3, leak level 1, 2, 3; AP, airway pressure; EP, esophageal pressure.

# Suppl. Figure 1

ONLINE DATA SUPPLEMENT

## Synchronization

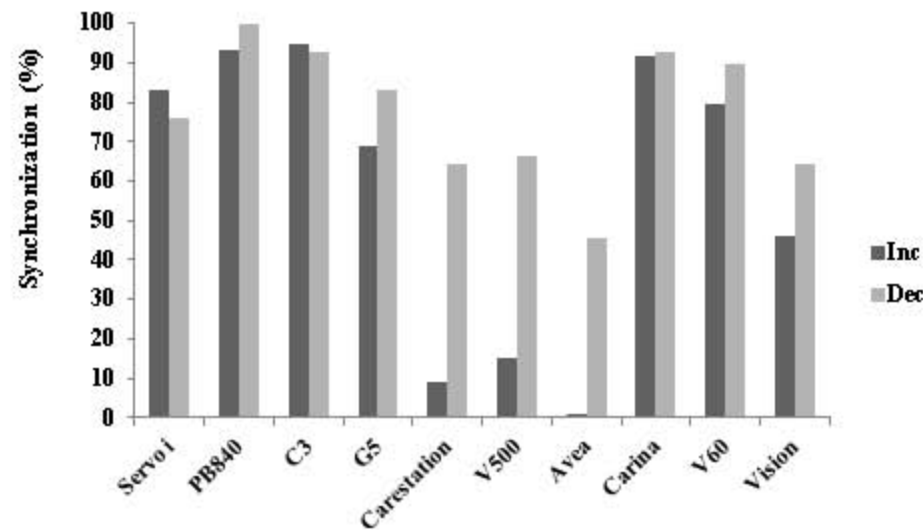

## Auto-triggering

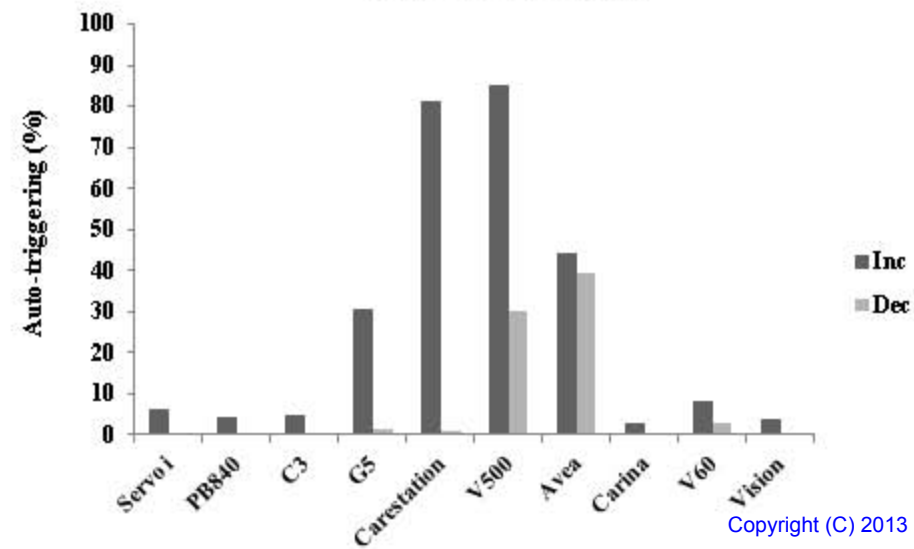

## Miss-triggering

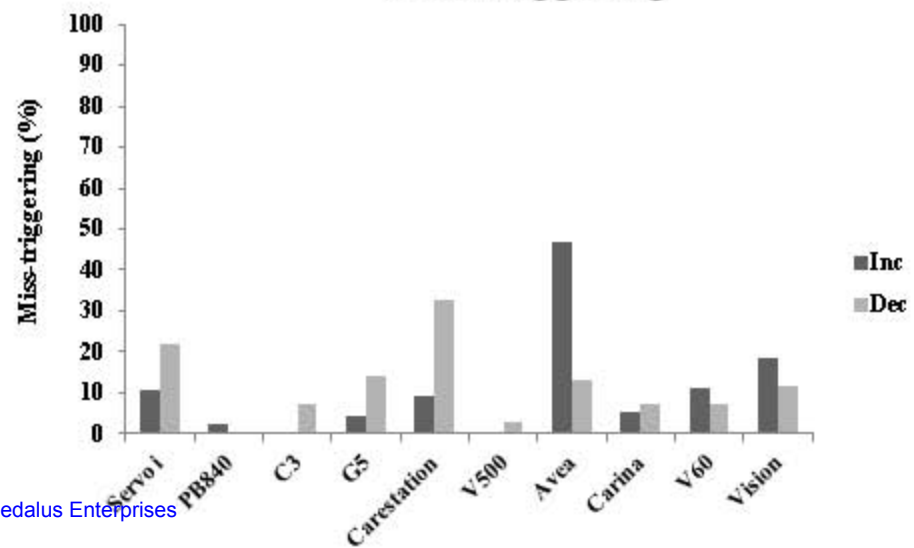

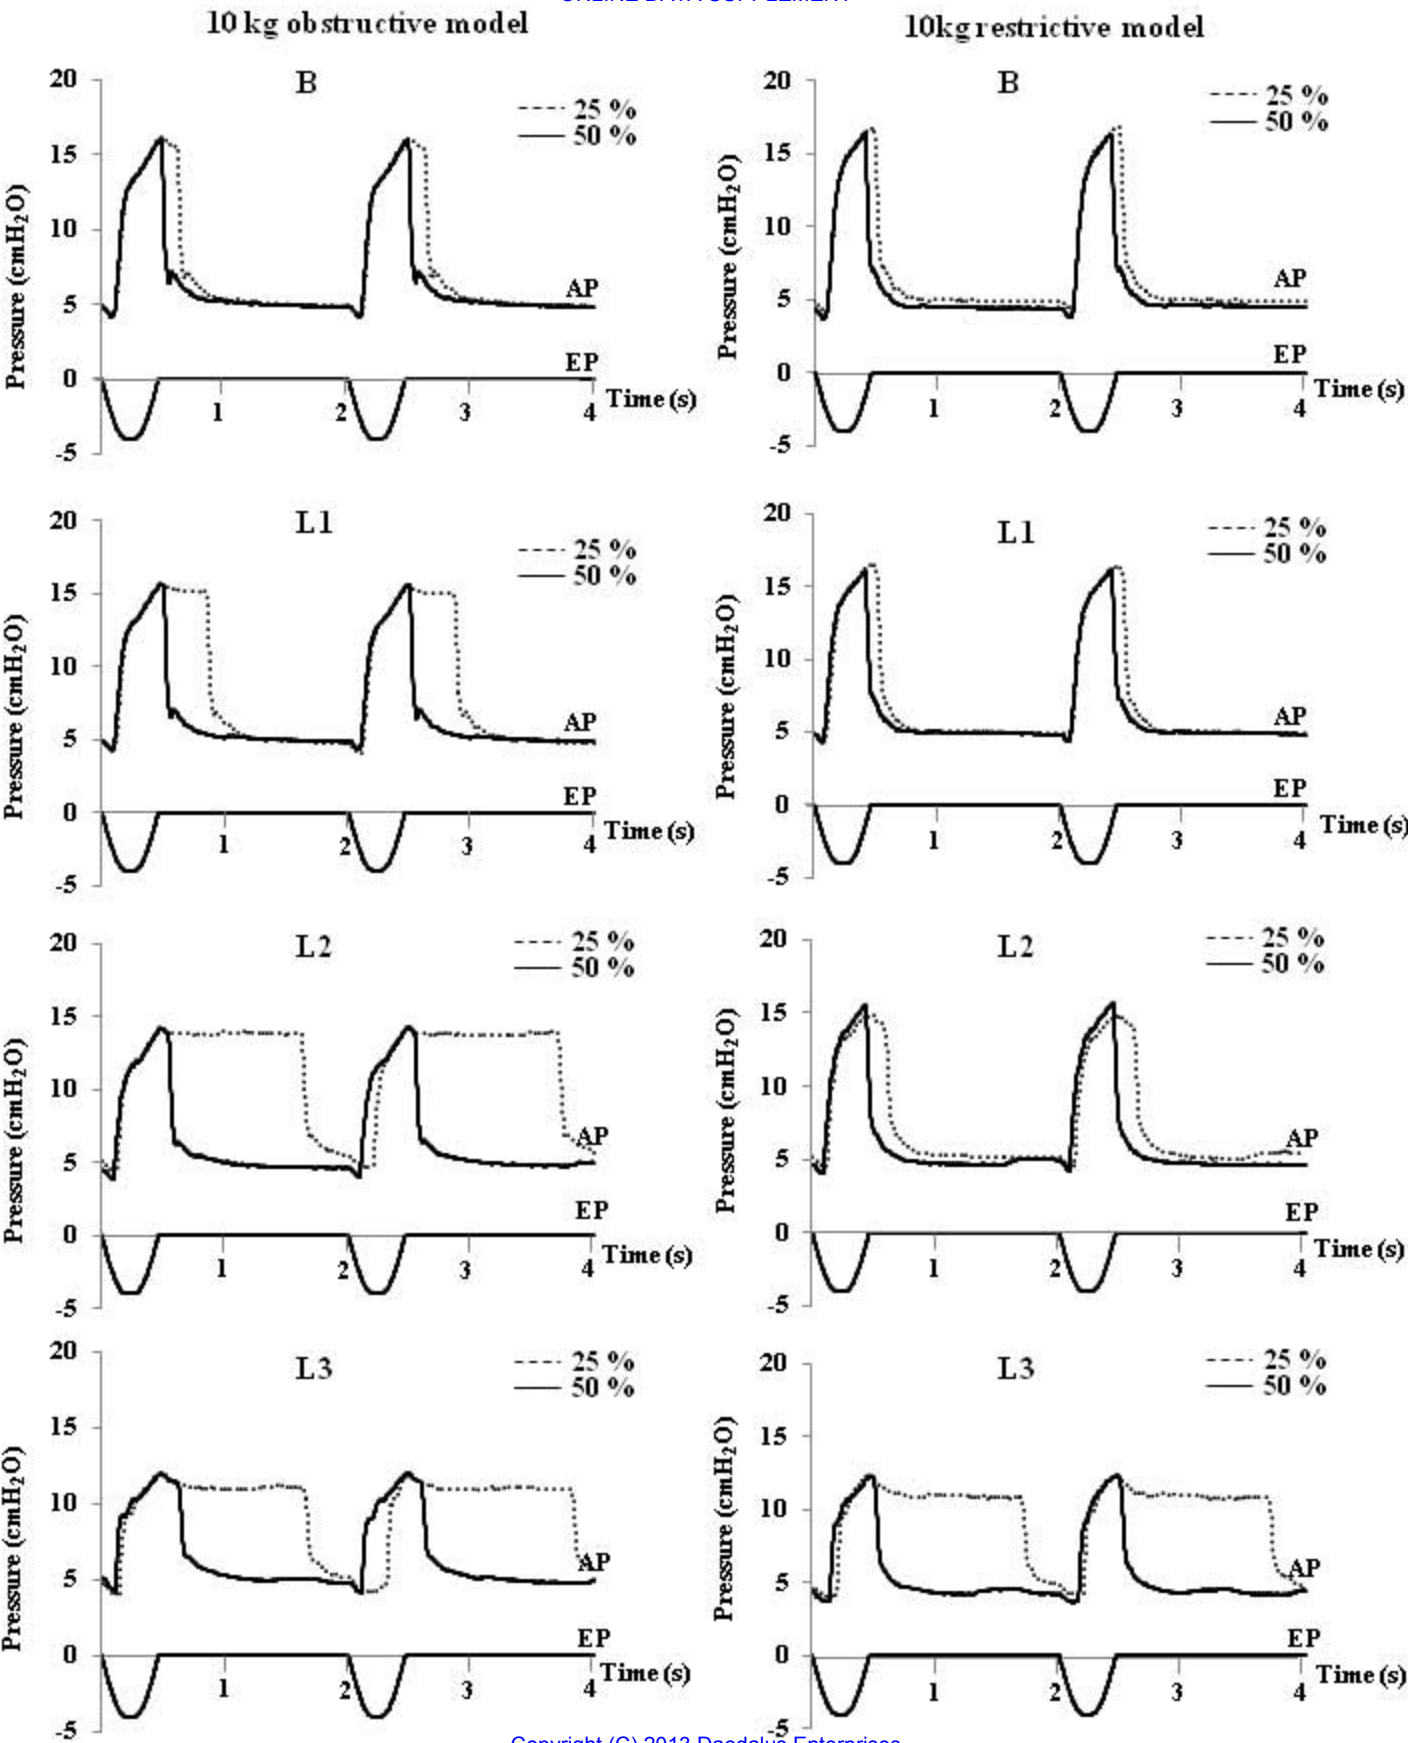

10 kg obstructive model

10kg restrictive model

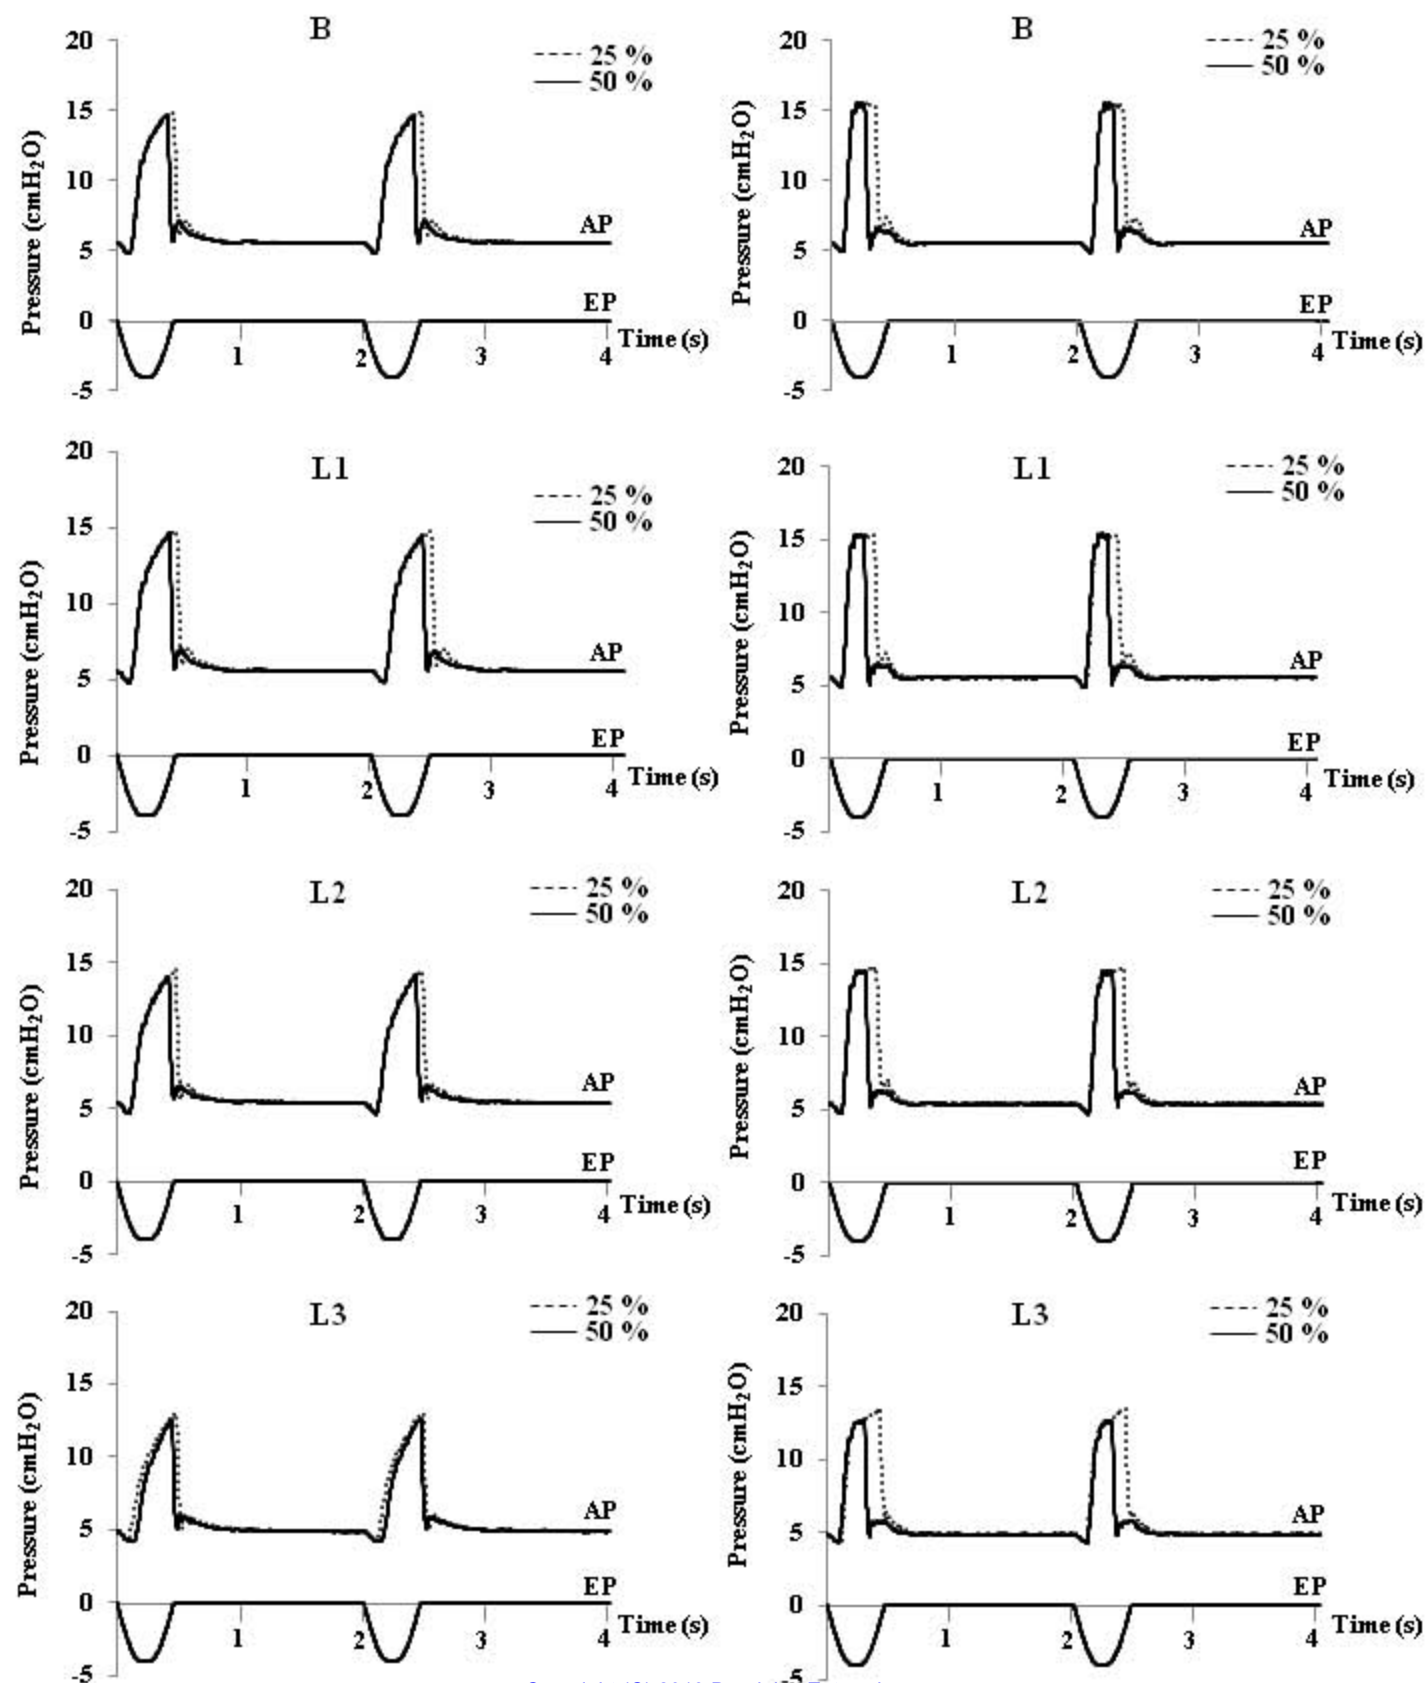

Supplement: RC-02616.R2_KACMAREK_Suppl.pdf [file RC-02616.R2_KACMAREK_Suppl.pdf]
